# Supplementary figures and images for: Population Dynamics and Breeding Preference of Aedes Aegypti and Ae. Albopictus Attributing to Dengue Threat in Kelaniya Medical Officer of Health Area in Sri Lanka
Source: Research Square preprint supplement (doi:10.21203/rs.3.rs-498370/v1), 2021-05-13

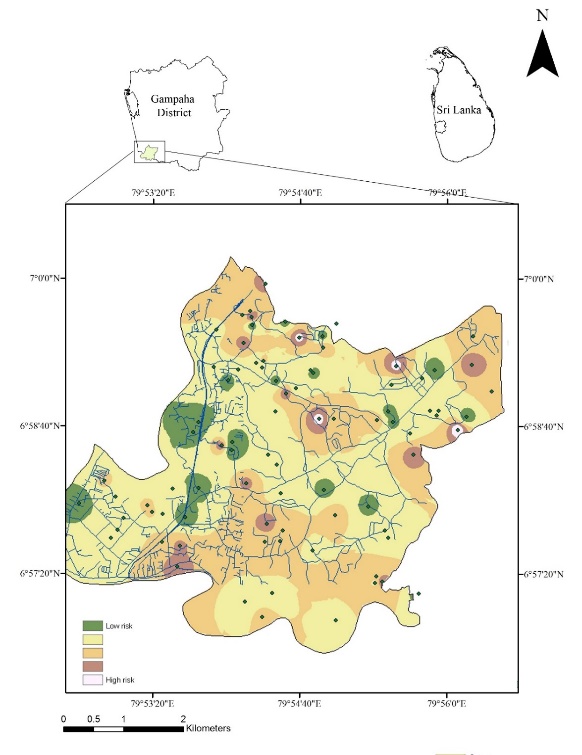

Supplement: Supplementary file 1 [file 1c110d2bb9934dce4803e6c2.docx]
